# Supplementary material for: Synthesis of novel Bi/Bi2O3@Al2O3 nanocomposites for wastewater treatment, self-cleaning, and corrosion resistance
Source: Royal Society of Chemistry journal article supplement (doi:10.1039/d4nj02556c), 2024-01-01
Supplement: d4nj02556c1.pdf [file d4nj02556c1.pdf]

## Synthesis of novel Bi/Bi<sub>2</sub>O<sub>3</sub>@Al<sub>2</sub>O<sub>3</sub> nanocomposite for wastewater treatment, self-cleaning, and corrosion resistance

Yang Jin<sup>a,b</sup>, Noor Hassan<sup>c\*</sup>, Umm E Kalsoom<sup>d</sup>, Fazila Mushtaq<sup>e</sup>, Muhammad Hammad ul Haq<sup>f</sup>, Zeeshan Ajmal<sup>g</sup>, Fuad A. Awwad<sup>h</sup>, Emad A. A. Ismail<sup>i</sup>, Ghulam Abbas Ashraf<sup>j\*</sup> and Sajid Mahmood<sup>k\*</sup>,

<sup>a</sup> Department of Communication and Telematics, Nanjing Vocational Institute of Railway Technology, Nanjing 210035, China.

<sup>b</sup> College of Automation Engineering, Nanjing University of Aeronautics and Astronautics, Nanjing 210016, China.

<sup>c, g</sup> College of Chemistry and Material Sciences, Zhejiang Normal University, Jinhua, 321004, Zhejiang, China.

<sup>d</sup> Institute of Environmental Sciences and Engineering, National University of Sciences and Technology (NUST), Islamabad, Pakistan.

<sup>e</sup> Institute of Chemical Sciences, Bahauddin Zakariya University, Multan, Pakistan

<sup>f</sup> School of Chemistry and Chemical Engineering, Beijing Institute of Technology, Beijing 102488, PR China.

<sup>h,i</sup> Department of Quantitative Analysis, College of Business Administration, King Saud University, P. O. Box 71115, Riyadh 11587, Saudi Arabia.

<sup>j</sup> Key Laboratory of Integrated Regulation and Resources Development on Shallow Lake of Ministry of Education, College of Environment, Hohai University, Nanjing 210098, China.

<sup>k</sup> Functional Materials Group, Gulf University for Science and Technology, Mishref, 32093, Kuwait.

**Corresponding author:** [raviannoor80@hotmail.com](mailto:raviannoor80@hotmail.com) (N. Hassan), [ga\\_phy@yahoo.com](mailto:ga_phy@yahoo.com) (G. A. Ashraf), and [sajidmahmood1987@yahoo.com](mailto:sajidmahmood1987@yahoo.com) (S. Mahmood).

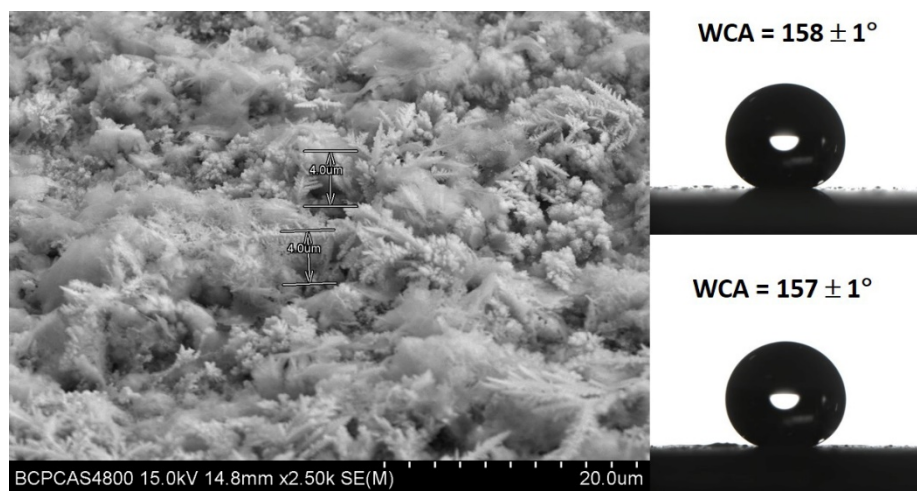

**Figure S1.** SEM image after the electrochemical impedance experiments by using 3.5% NaCl solution along with water contact angles before and after the experiment.

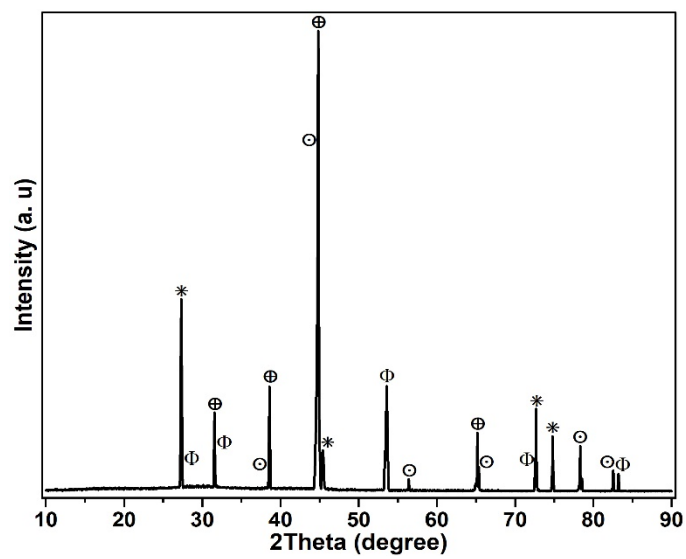

Figure S2. XRD analysis after the electrochemical impedance experiments by using 3.5% NaCl solution.

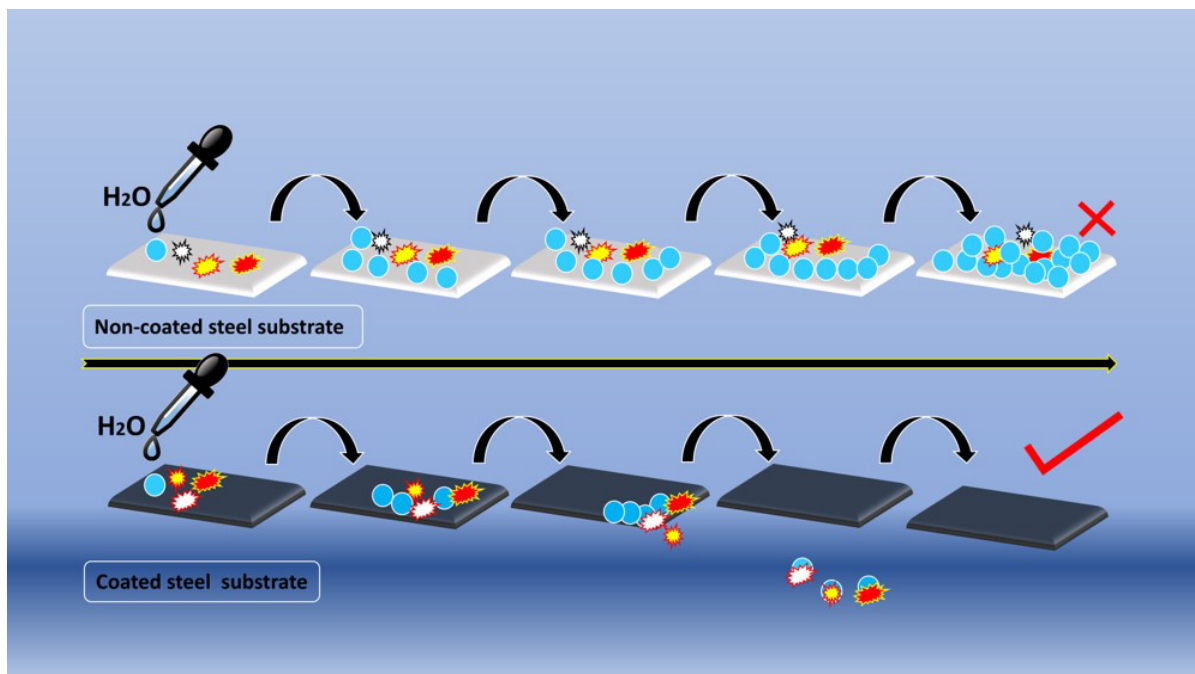

**Figure S3.** Images of self-cleaning phenomena the non-coated and coated by polymeric coating of bismuth-aluminum oxides nanocomposite of the substrate surface.
